# Supplementary figures and images for: From behavior to circuit modeling of light-seeking navigation in zebrafish larvae
Source: eLife journal article supplement (doi:10.7554/elife.52882), 2020-01-02

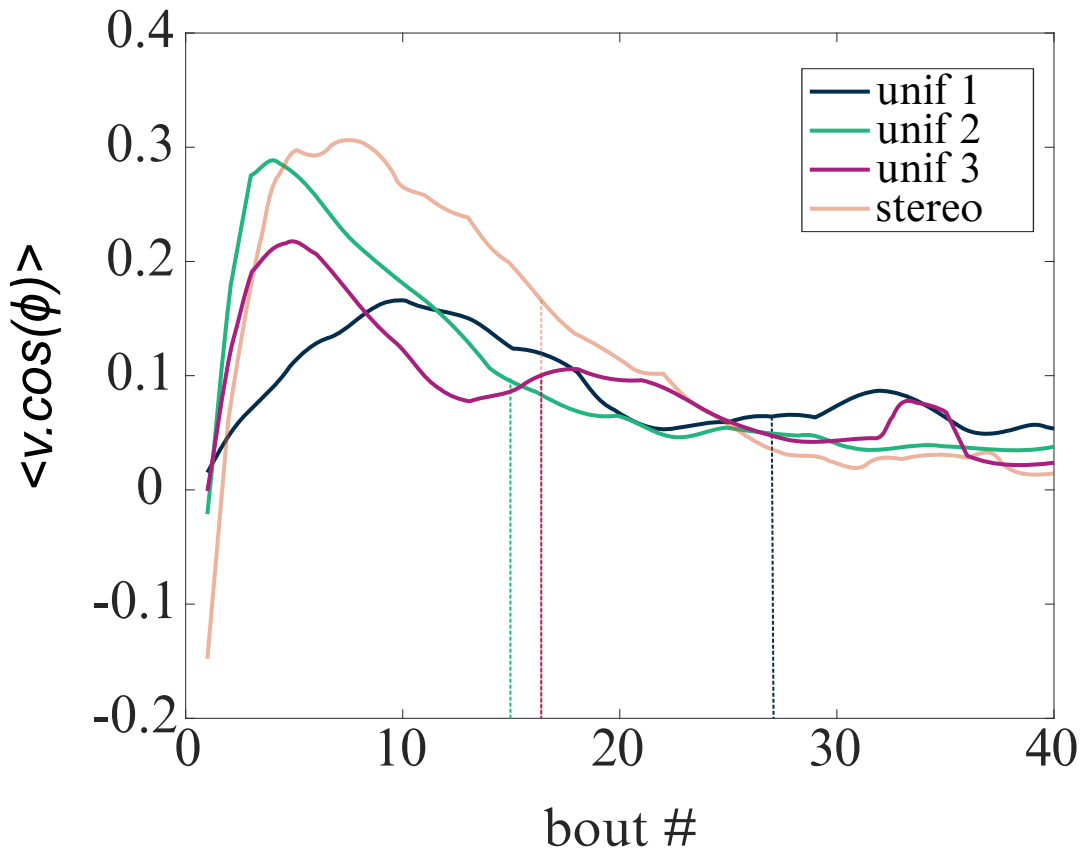

Supplement: supp [file elife_poa_e52882_Figure_2_figure_supplement_1.pdf › elife_poa_e52882_Figure_2_figure_supplement_1.pdf]

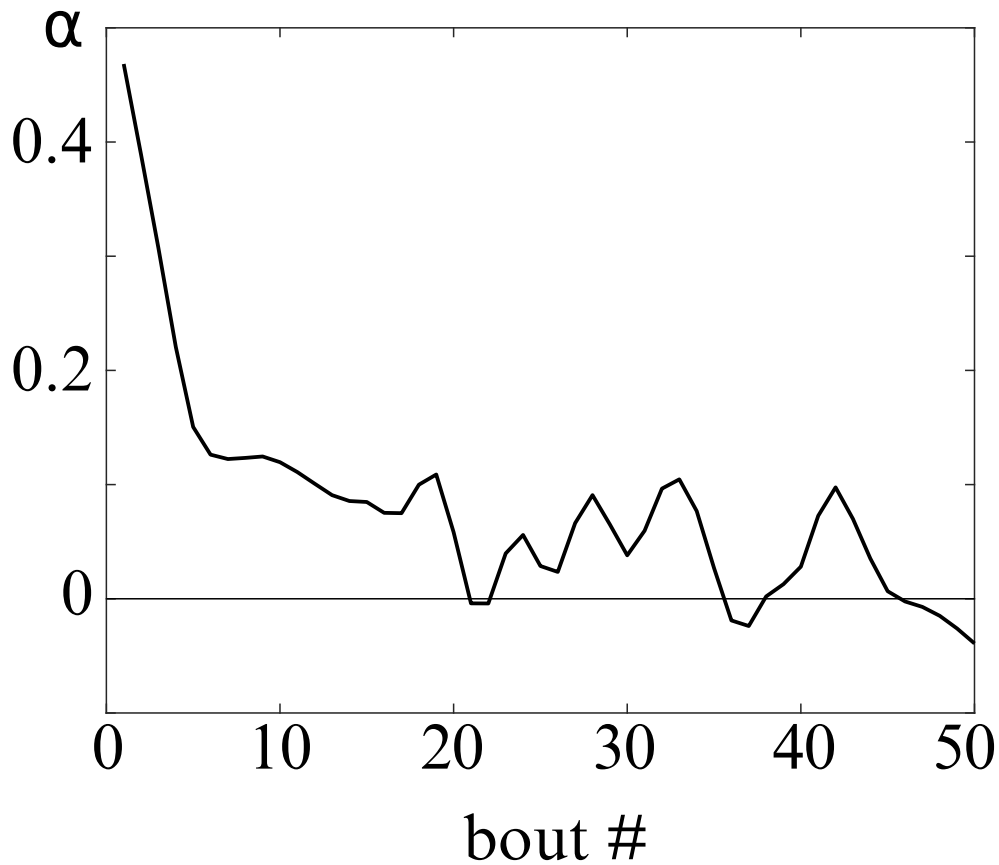

Supplement: supp [file elife_poa_e52882_Figure_2_figure_supplement_2.pdf › elife_poa_e52882_Figure_2_figure_supplement_2.pdf]

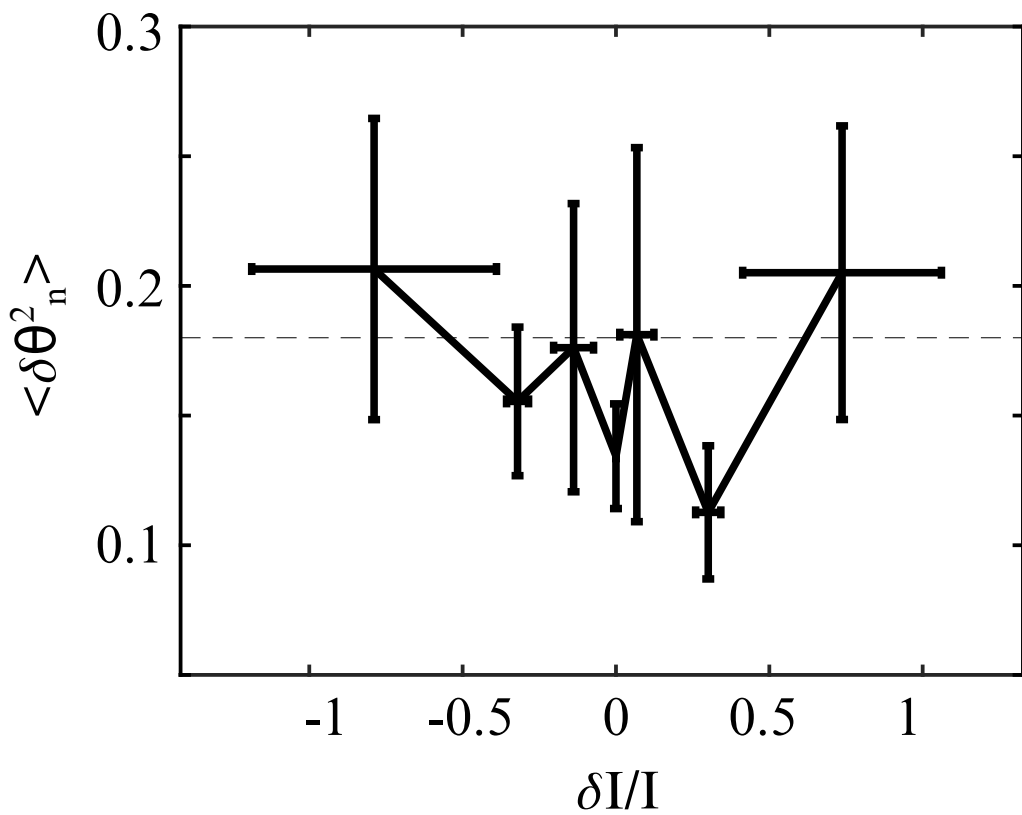

pvals

$\delta I/I$

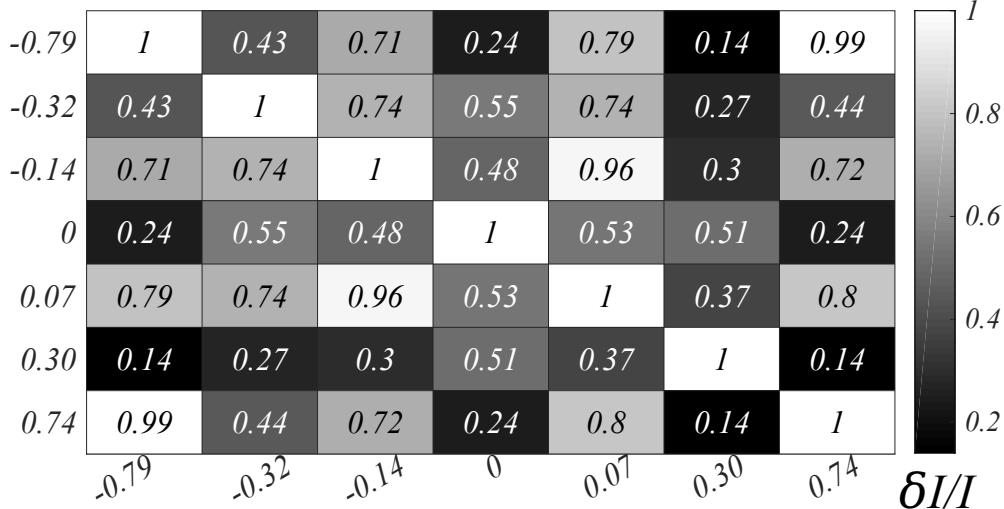

Supplement: supp [file elife_poa_e52882_Figure_3_figure_supplement_2.pdf › elife_poa_e52882_Figure_3_figure_supplement_2.pdf]

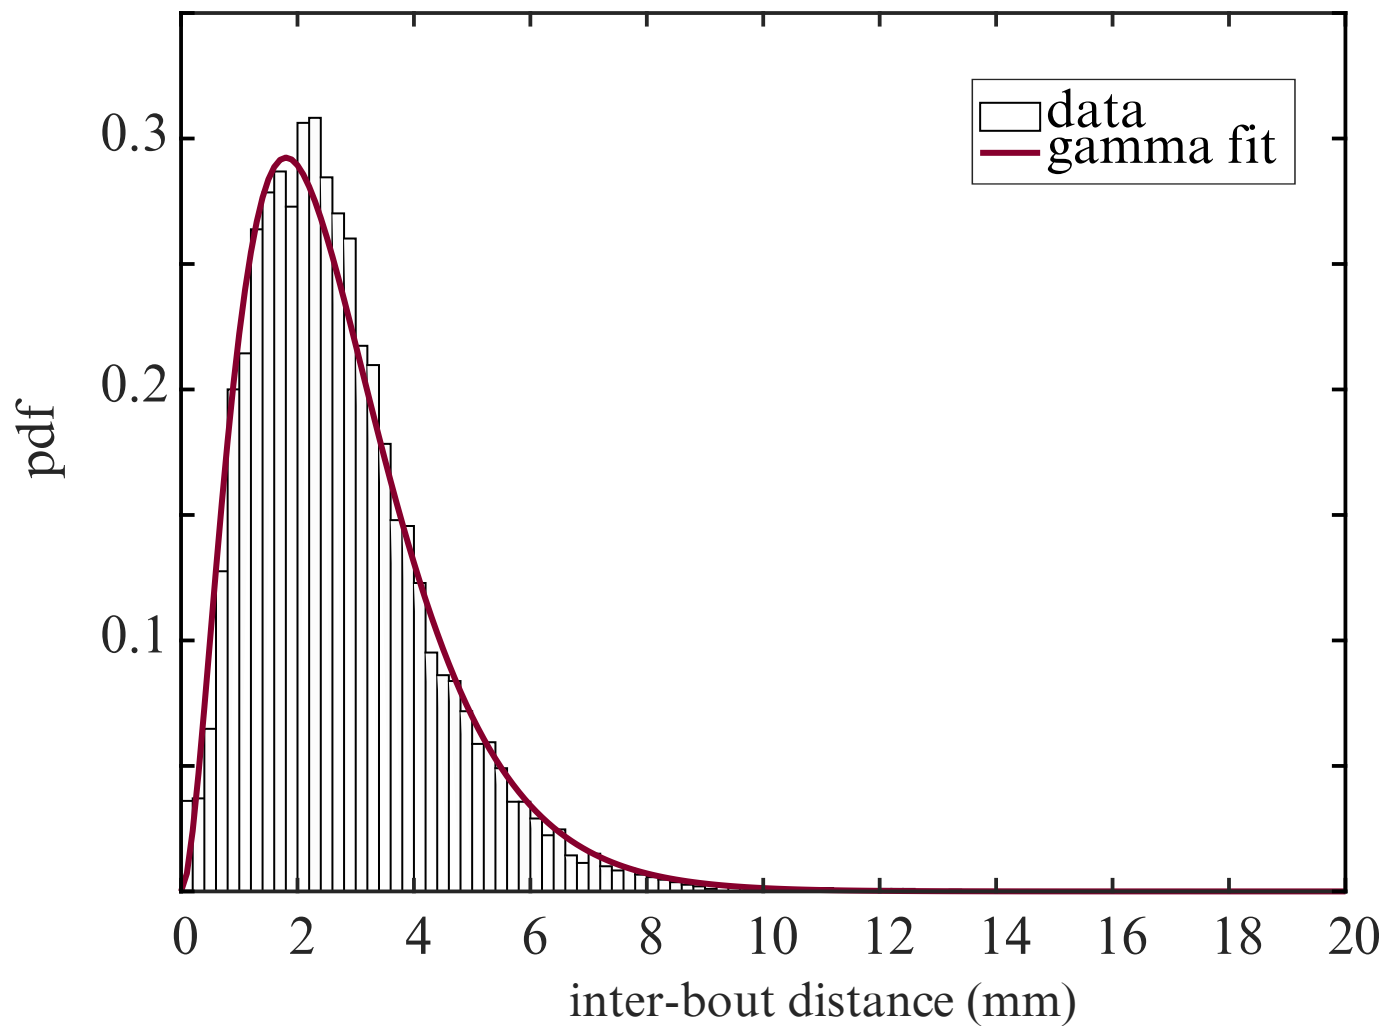

Supplement: supp [file elife_poa_e52882_Figure_4_figure_supplement_1.pdf › elife_poa_e52882_Figure_4_figure_supplement_1.pdf]

**Data**

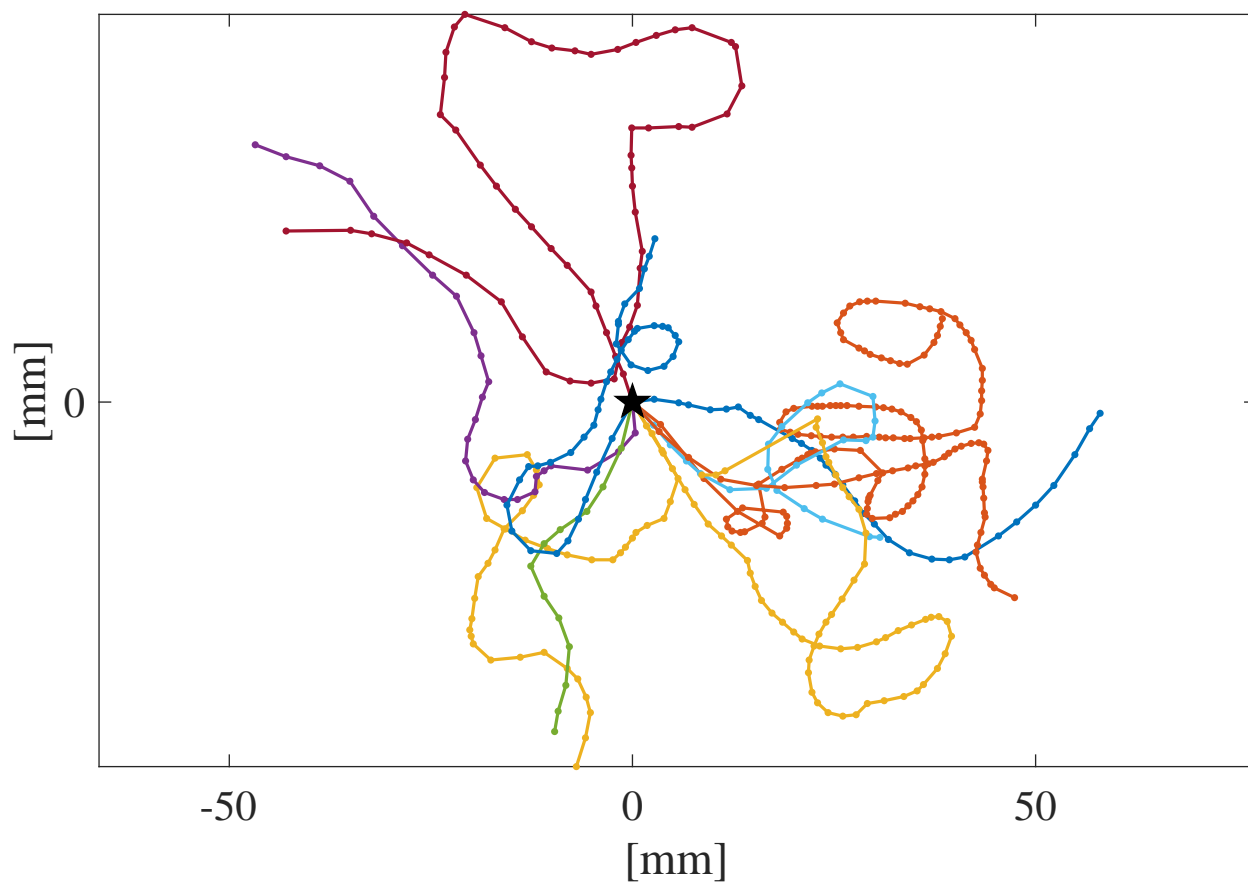

**Simulation**

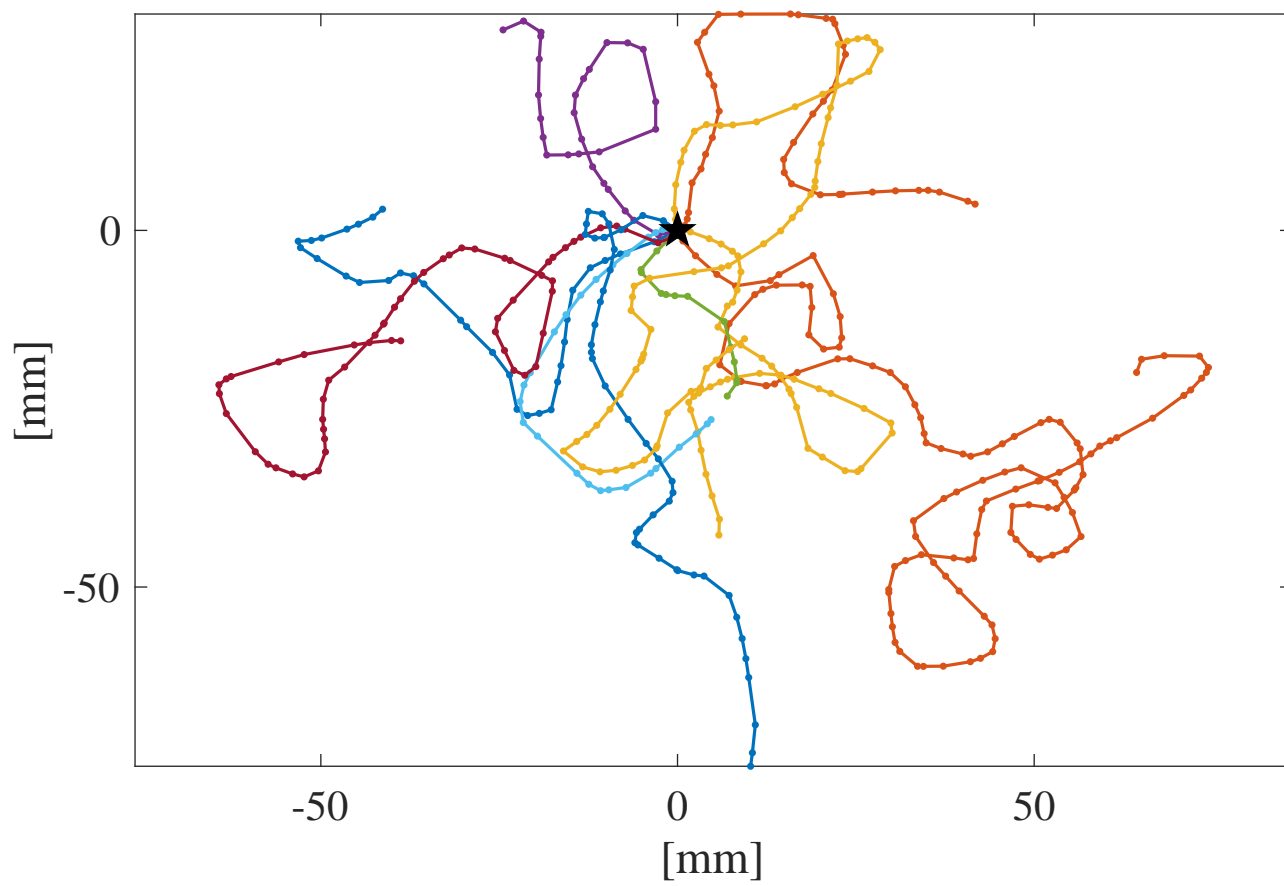

Supplement: supp [file elife_poa_e52882_Figure_5_figure_supplement_1.pdf › elife_poa_e52882_Figure_5_figure_supplement_1.pdf]
